# Supplementary material for: All-Trans Retinoic Acid Exhibits Antiviral Effect against SARS-CoV-2 by Inhibiting 3CLpro Activity
Source: MDPI journal article supplement (doi:10.3390/v13081669), 2021-08-23
Supplement: s1 [file s1]

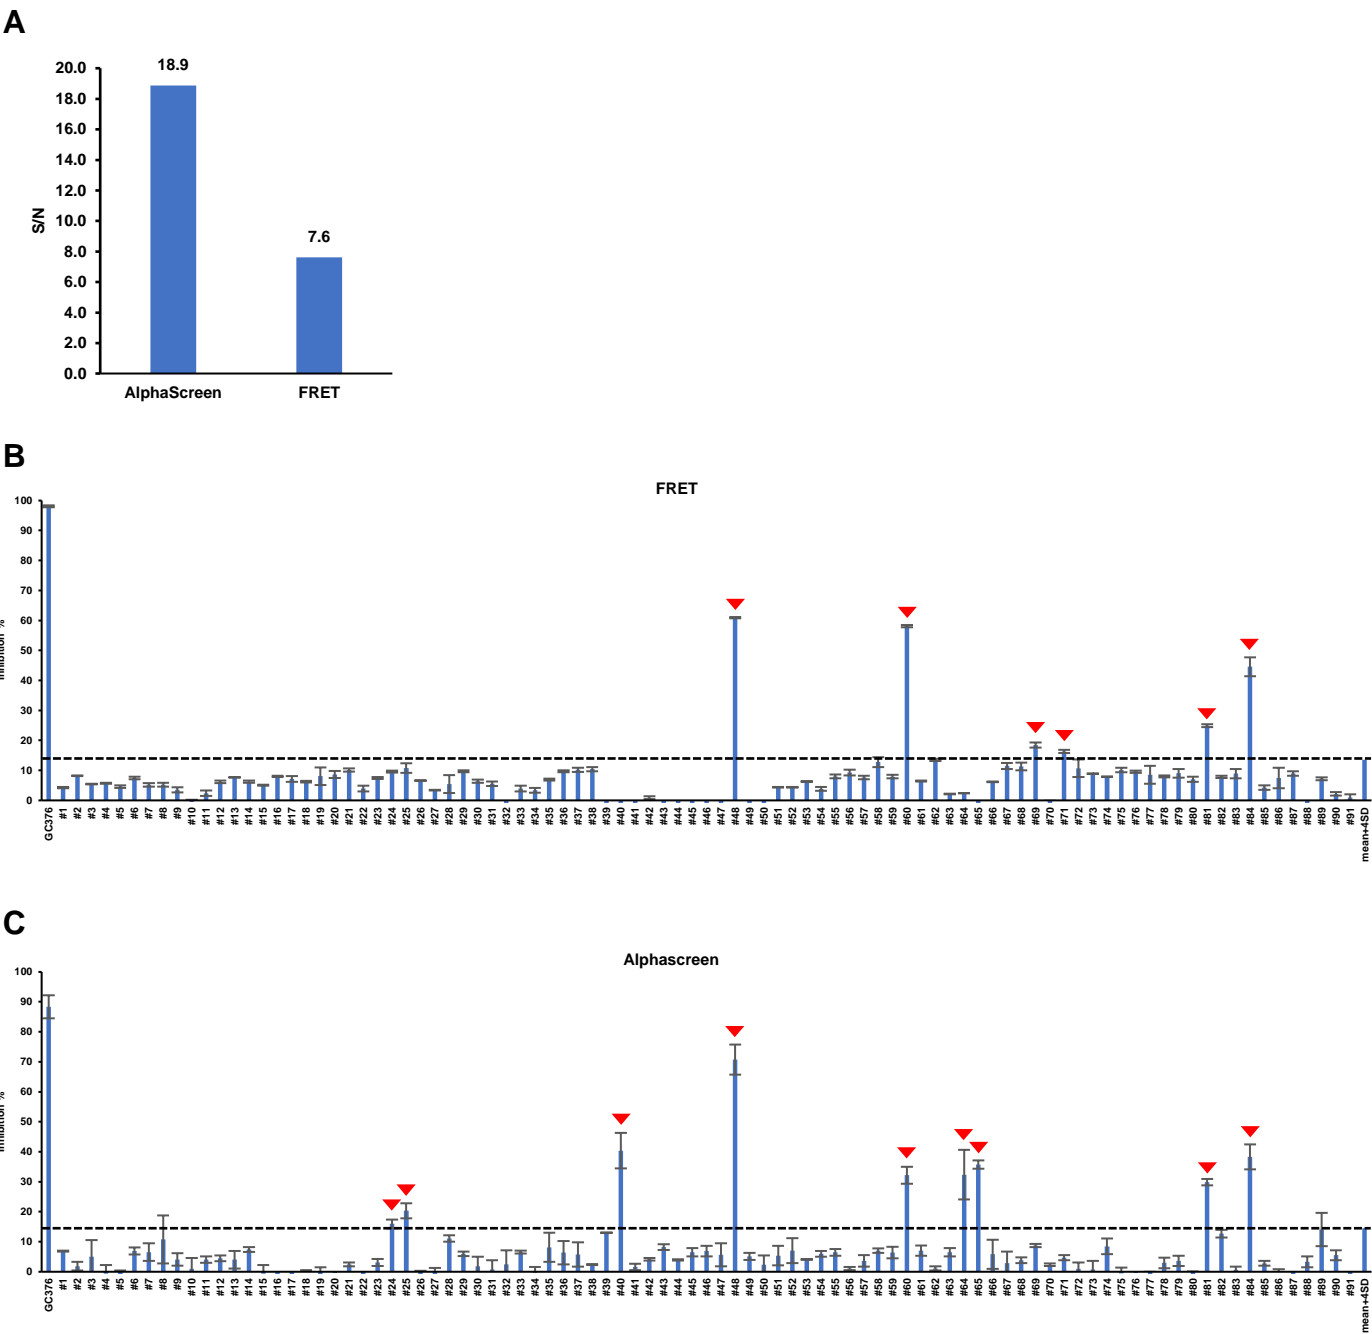

**Figure S1. The comparison of FRET and AlphaScreen.**

(A) The comparison of sensitivity between FRET and AlphaScreen by S/N ratio.

(B, C) Comparison of FRET and AlphaScreen of compounds used for screening in this experiment by inhibition rate of SARS-CoV-2 3CLpro. The result of FRET (B) and AlphaScreen (C). Compounds with inhibition rates above the mean +4 SD were marked on these graphs.

**Figure S1**

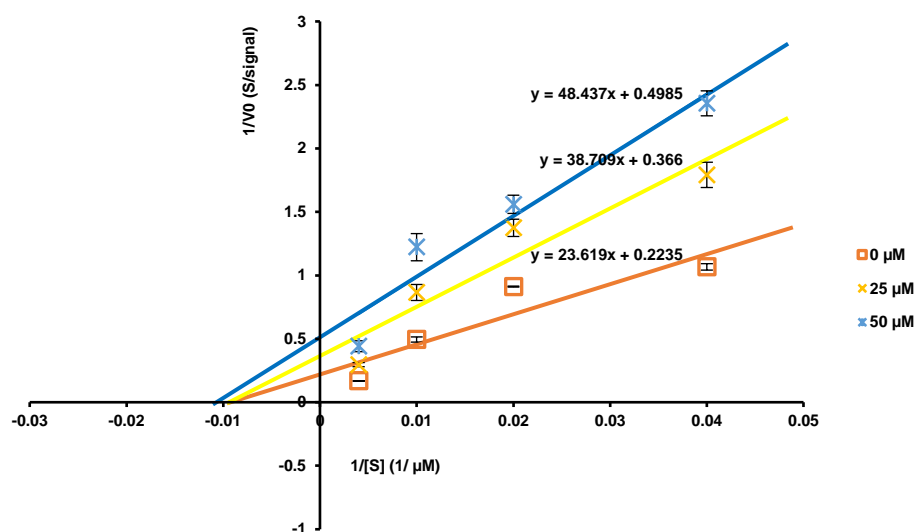

**Figure S2. Graphical determination of the type pf inhibition.**

Lineweaver-Burk plot of the inhibitory effect of ATRA (0, 25, 50,  $\mu\text{M}$ ) on SARS-CoV-2 3CLpro at 100 nM.

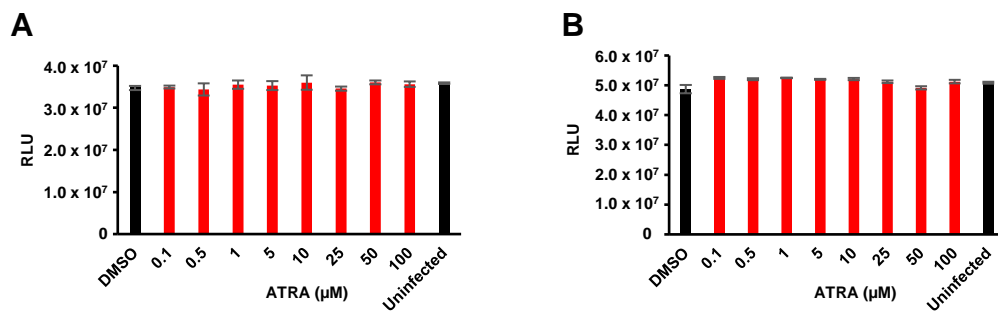

**Figure S3. Cytotoxicity of ATRA**

(A) Cell viability assay for cytotoxicity at various concentrations of ATRA treated VeroE6/TMPRSS2 cells for 48 hours.  
 (B) Cell viability assay for cytotoxicity at various concentrations of ATRA treated Calu-3 cells for 72 hours.

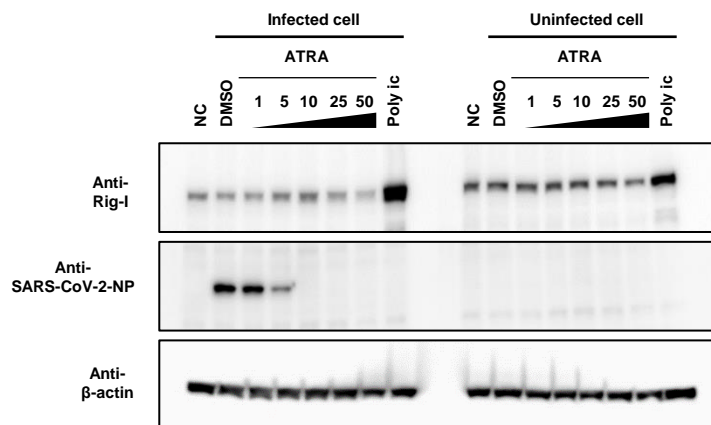

**Figure S4. Protein expression in ATRA treated Calu-3 cells during SARS-CoV-2 infection.**

Immunoblot analysis of RIG-I, SARS-CoV-2 NP, and  $\beta$ -actin in Calu-3 cell treated with ATRA and Poly I:C.

3CLpro

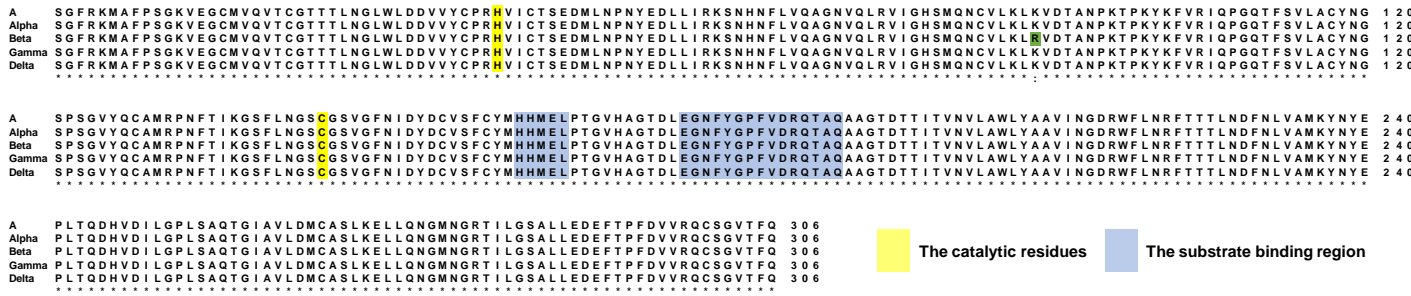

Figure S5. Amino acid sequence alignment of 3CLpro.

Amino acid sequence alignment of 3CLpro from SARS-CoV-2 first isolate strain (lineage A) and VOC; alpha, beta, gamma and delta.

Figure S5

Table S1

| No. | Compound name                                                                     |
|-----|-----------------------------------------------------------------------------------|
| #1  | Delphinidin 3-glucoside chloride                                                  |
| #2  | Cyanidin 3-glucoside chloride                                                     |
| #3  | Petunidin 3-glucoside chloride                                                    |
| #4  | Peonidin 3-glucoside chloride                                                     |
| #5  | Delphinidin 3-rutinoside chloride                                                 |
| #6  | Cyanidin 3-rutinoside chloride                                                    |
| #7  | Delphinidin chloride                                                              |
| #8  | Cyanidin chloride                                                                 |
| #9  | Cyanidin 3-sophoroside chloride                                                   |
| #10 | Cyanidin 3-(2G-glucosylrutinoside) chloride                                       |
| #11 | Delphinidin 3-galactoside chloride                                                |
| #12 | Cyanidin 3-galactoside chloride                                                   |
| #13 | Petunidin 3-galactoside chloride                                                  |
| #14 | Peonidin 3-galactoside chloride                                                   |
| #15 | Malvidin 3-galactoside chloride                                                   |
| #16 | Pelargonidin 3-glucoside chloride                                                 |
| #17 | Delphinidin 3-sambubioside chloride                                               |
| #18 | Delphinidin 3,5-diglucoside chloride                                              |
| #19 | Cyanidin 3-sambubioside-5-glucoside chloride                                      |
| #20 | Cyanidin 3-sambubioside chloride                                                  |
| #21 | Delphinidin 3-arabinoside chloride                                                |
| #22 | Procyanidin B-1                                                                   |
| #23 | Hyperoside                                                                        |
| #24 | Pteropodine (Uncalin C)                                                           |
| #25 | Isopteropodine (Uncalin E)                                                        |
| #26 | 6-Hydroxygenistein 6,7-diglucoside                                                |
| #27 | Tectorigenin 7-o-xylosylglucoside                                                 |
| #28 | Licochalcone A                                                                    |
| #29 | Daidzin                                                                           |
| #30 | Daidzein                                                                          |
| #31 | Glycitin                                                                          |
| #32 | Glycitein                                                                         |
| #33 | Genistin                                                                          |
| #34 | Genistein                                                                         |
| #35 | Xanthohumol                                                                       |
| #36 | Isoquercitrin                                                                     |
| #37 | Luteolin                                                                          |
| #38 | (+)-Catechin                                                                      |
| #39 | (-)-Epicatechin                                                                   |
| #40 | (-)-Epigallocatechin                                                              |
| #41 | (-)-Epicatechin gallate                                                           |
| #42 | (-)-Epigallocatechin gallate                                                      |
| #43 | 3,5,7,3',4'-Pentamethoxyflavone                                                   |
| #44 | 5,7,4'-Trimethoxyflavone                                                          |
| #45 | 5,7-Dimethoxyflavone                                                              |
| #46 | 3,5,7-Trimethoxyflavone                                                           |
| #47 | 3,5,7,4'-tetramethoxyflavone                                                      |
| #48 | All-trans-retinoic acid                                                           |
| #49 | Liquiritin                                                                        |
| #50 | Liquiritigenin                                                                    |
| #51 | Glabridin                                                                         |
| #52 | Hesperidin                                                                        |
| #53 | Neohesperidin                                                                     |
| #54 | Calycosin 7-O-Glucoside                                                           |
| #55 | Quercetin 3-O-[2"-O-(6'''-O-p-Coumaroyl)-b-D-Glucopyranosyl]-a-L-Rhamnopyranoside |
| #56 | Quercetin 3-O-[2"-O-b-D-Glucopyranosyl]-a-L-Rhamnopyranoside                      |
| #57 | (-)-Gallocatechin 3-O-(3"-O-methyl)gallate                                        |
| #58 | Isoliquiritin                                                                     |
| #59 | Ganoderic acid A                                                                  |
| #60 | Corosolic acid                                                                    |
| #61 | Soyasapogenol B                                                                   |
| #62 | 18β-Glycyrrhetic acid                                                             |
| #63 | Bilobalide                                                                        |
| #64 | Ginkgolide A                                                                      |
| #65 | Ginkgolide B                                                                      |
| #66 | Ginkgolide C                                                                      |
| #67 | Glycyrrhizinic acid (Glycyrrhizin)                                                |
| #68 | Soyasaponin I                                                                     |
| #69 | Soyasaponin V                                                                     |
| #70 | Deacylgymnemic acid                                                               |
| #71 | Ginsenoside Rg1                                                                   |
| #72 | Tenuifolin                                                                        |
| #73 | Withaferin A                                                                      |
| #74 | Tectoridin                                                                        |
| #75 | Tectorigenin                                                                      |
| #76 | Rhynchophylline                                                                   |
| #77 | Verbascoside (acteoside)                                                          |
| #78 | Arctiin                                                                           |
| #79 | Echinacoside                                                                      |
| #80 | Isoacteoside                                                                      |
| #81 | 6-Gingerol                                                                        |
| #82 | 8-Gingerol                                                                        |
| #83 | 10-Gingerol                                                                       |
| #84 | 6-Shogaol                                                                         |
| #85 | Cryptochlorogenic acid                                                            |
| #86 | Neochlorogenic acid                                                               |
| #87 | Isochlorogenic acid A                                                             |
| #88 | Isochlorogenic acid B                                                             |
| #89 | Sennoside A                                                                       |
| #90 | Sennoside B                                                                       |
| #91 | Mangiferin                                                                        |
